# Supplementary material
Source: PubMed Central journal article supplement (PMC7219911)
Supplement: Supplementary_tables.pdf [file Supplementary_tables.pdf]

Table S1: Key metabolite concentrations normalized to water in the ACC (mean  $\pm$  standard error mean)(institutional units). NAA: N-Acetylaspartate, Cre: Creatine+phosphocreatine, GABA: Gamma amino butyric acid, Gln: Glutamine, Glu: Glutamate

|                         | Male-SB+<br>( $\times 10^{-4}$ ) | Male-SB-<br>( $\times 10^{-4}$ ) | Female-SB+<br><br>( $\times 10^{-4}$ ) | Female-SB-<br><br>( $\times 10^{-4}$ ) | <i>p</i> value<br>(SB+<br>vs.SB-) | <i>p</i> value<br>(males<br>SB+<br>vs.males<br>SB-) | <i>p</i> value<br>(females<br>SB+<br>vs.females<br>SB-) |
|-------------------------|----------------------------------|----------------------------------|----------------------------------------|----------------------------------------|-----------------------------------|-----------------------------------------------------|---------------------------------------------------------|
| NAA/H <sub>2</sub> O    | 2.89 $\pm$ 0.11                  | 2.86 $\pm$ 0.10                  | 2.71 $\pm$ 0.16                        | 2.35 $\pm$ 0.19                        | 0.54                              | 0.83                                                | 0.23                                                    |
| Cr+PCr/H <sub>2</sub> O | 2.2 $\pm$ 0.09                   | 2.2 $\pm$ 0.15                   | 1.9 $\pm$ 0.12                         | 1.7 $\pm$ 0.11                         | 0.77                              | 0.94                                                | 0.24                                                    |
| GABA/H <sub>2</sub> O   | 0.41 $\pm$ 0.03                  | 0.38 $\pm$ 0.03                  | 0.29 $\pm$ 0.02                        | 0.33 $\pm$ 0.03                        | 0.72                              | 0.64                                                | 0.44                                                    |
| Gln/H <sub>2</sub> O    | 0.55 $\pm$ 0.3                   | 0.54 $\pm$ 0.05                  | 0.42 $\pm$ 0.05                        | 0.42 $\pm$ 0.04                        | 0.8                               | 0.82                                                | 0.97                                                    |
| Glu/H <sub>2</sub> O    | 2.43 $\pm$ 0.11                  | 2.46 $\pm$ 0.12                  | 2.19 $\pm$ 0.12                        | 1.89 $\pm$ 0.27                        | 0.8                               | 0.89                                                | 0.24                                                    |
